# Supplementary material for: Agent-based model demonstrates the impact of nonlinear, complex interactions between cytokines on muscle regeneration
Source: eLife. 2024 Jun 3;13:RP91924. doi: 10.7554/eLife.91924 (PMC11147512; doi:10.7554/eLife.91924)
Supplement: Supplementary file 3. [file elife-91924-supp3.docx]

**Supplemental Table 3.** CPM Mathematical Implementation

| **Representation** | **Mathematical Formulation** | **Equation Terms** | **Explanation** |
| --- | --- | --- | --- |
| Contact Energy (H1) |  | J | Contact Coefficient |
| , | Neighboring lattice sites of individual cells |
| t | Cell types |
|  | Kronecker delta, localizes contact energy contributions to cell-cell interfaces |
| Volume constraint (H2) |  |  | Volume constraint scaling factor |
| Logarithmic chemotaxis (H3) |  |  | Chemotaxis Parameter |
| *c* | Chemical field concentration |
|  | Cell body centroid from which chemotaxis behaviors are calculated |
| t | Cell types |
|  | Time |
|  | Lattice site |
| Diffusion of chemical species |  | *c* | Chemical field concentration |
| *k* | Decay constant |
| *D* | Diffusion constant |
| *S* | Secretion |
